# Supplementary material
Source: PubMed Central journal article supplement (PMC5838572)
Supplement: jamapsychiatry-75-158-s002.pdf [file jamapsychiatry-75-158-s002.pdf]

## Supplementary Online Content

Sampaio-Junior B, Tortella G, Borrione L, et al. Efficacy and safety of transcranial direct current stimulation as an add-on treatment for bipolar depression: a randomized clinical trial. *JAMA Psychiatry*. Published online December 27, 2017.

doi:10.1001/jamapsychiatry.2017.4040

### **eTable.** Mood Scores Over Time

This supplementary material has been provided by the authors to give readers additional information about their work.

**eTable. Mood Scores Over Time**

|                                      | Group  | Baseline   | Week 2      | Week 4     | Week 6     |
|--------------------------------------|--------|------------|-------------|------------|------------|
| <b>Intention to treat, mean (SD)</b> |        |            |             |            |            |
| <b>HDRS</b>                          | Active | 23.1 (3.9) | 11.4 (5.5)  | 10.7 (5.3) | 10.3 (5.6) |
|                                      | Sham   | 23.5 (4.7) | 15.8 (8.3)  | 14.7 (7.4) | 16.2 (7.7) |
| <b>MADRS</b>                         | Active | 28.7 (5.3) | 15.1 (6.9)  | 14.2 (7.3) | 13.6 (8)   |
|                                      | Sham   | 27.9 (5)   | 19.5 (10.4) | 18.3 (10)  | 19 (10.3)  |
| <b>CGI</b>                           | Active | 3.5 (0.8)  | 2 (1)       | 2 (1.1)    | 1.8 (1.2)  |
|                                      | Sham   | 3.4 (0.7)  | 2.5 (1.3)   | 2.2 (1.2)  | 2.3 (1.3)  |
| <b>YMRS</b>                          | Active | 2.4 (2)    | 1.8 (2.1)   | 2.3 (2.8)  | 2.3 (3)    |
|                                      | Sham   | 2 (1.9)    | 2 (2.8)     | 2.9 (3.3)  | 2.3 (2.7)  |
| <b>Per protocol, mean (SD)</b>       |        |            |             |            |            |
| <b>HDRS</b>                          | Active | 23.1 (3.9) | 10.5 (4.2)  | 9.8 (4)    | 9.2 (4.3)  |
|                                      | Sham   | 23.5 (4.7) | 15.3 (8.3)  | 13.4 (6.6) | 15.2 (7.2) |
| <b>MADRS</b>                         | Active | 28.7 (5.3) | 14.8 (5.5)  | 12.9 (6.4) | 12 (7.1)   |
|                                      | Sham   | 27.9 (5)   | 18.9 (10.4) | 16.8 (9.2) | 17.5 (9.8) |
| <b>CGI</b>                           | Active | 3.5 (0.8)  | 1.9 (1)     | 1.8 (1.1)  | 1.6 (1.1)  |
|                                      | Sham   | 3.4 (0.7)  | 2.4 (1.3)   | 2.1 (1.1)  | 2.1 (1.3)  |
| <b>YMRS</b>                          | Active | 2.4 (2)    | 1.6 (2.1)   | 2.2 (3)    | 2.3 (3.2)  |
|                                      | Sham   | 2 (1.9)    | 2 (2.9)     | 3.1 (3.3)  | 2.4 (2.8)  |

HDRS-17, Hamilton Depression Rating Scale-17 item version. MADRS, Montgomery-Åsberg Depression Rating Scale. YMRS, Young Manic Rating Scale. CGI, Clinical Global Impression scale. For the intention-to-treat scores, mean (SD) values were estimated using the last observation carried forward approach. For the per protocol scores, mean (SD) values were estimated based in the completer sample.
